# Supplementary material
Source: Springer Nature journal article supplement (https://www.springermedizin.de/resource/supplementary/13006_2011_136_MOESM1_ESM.pdf/9628090)

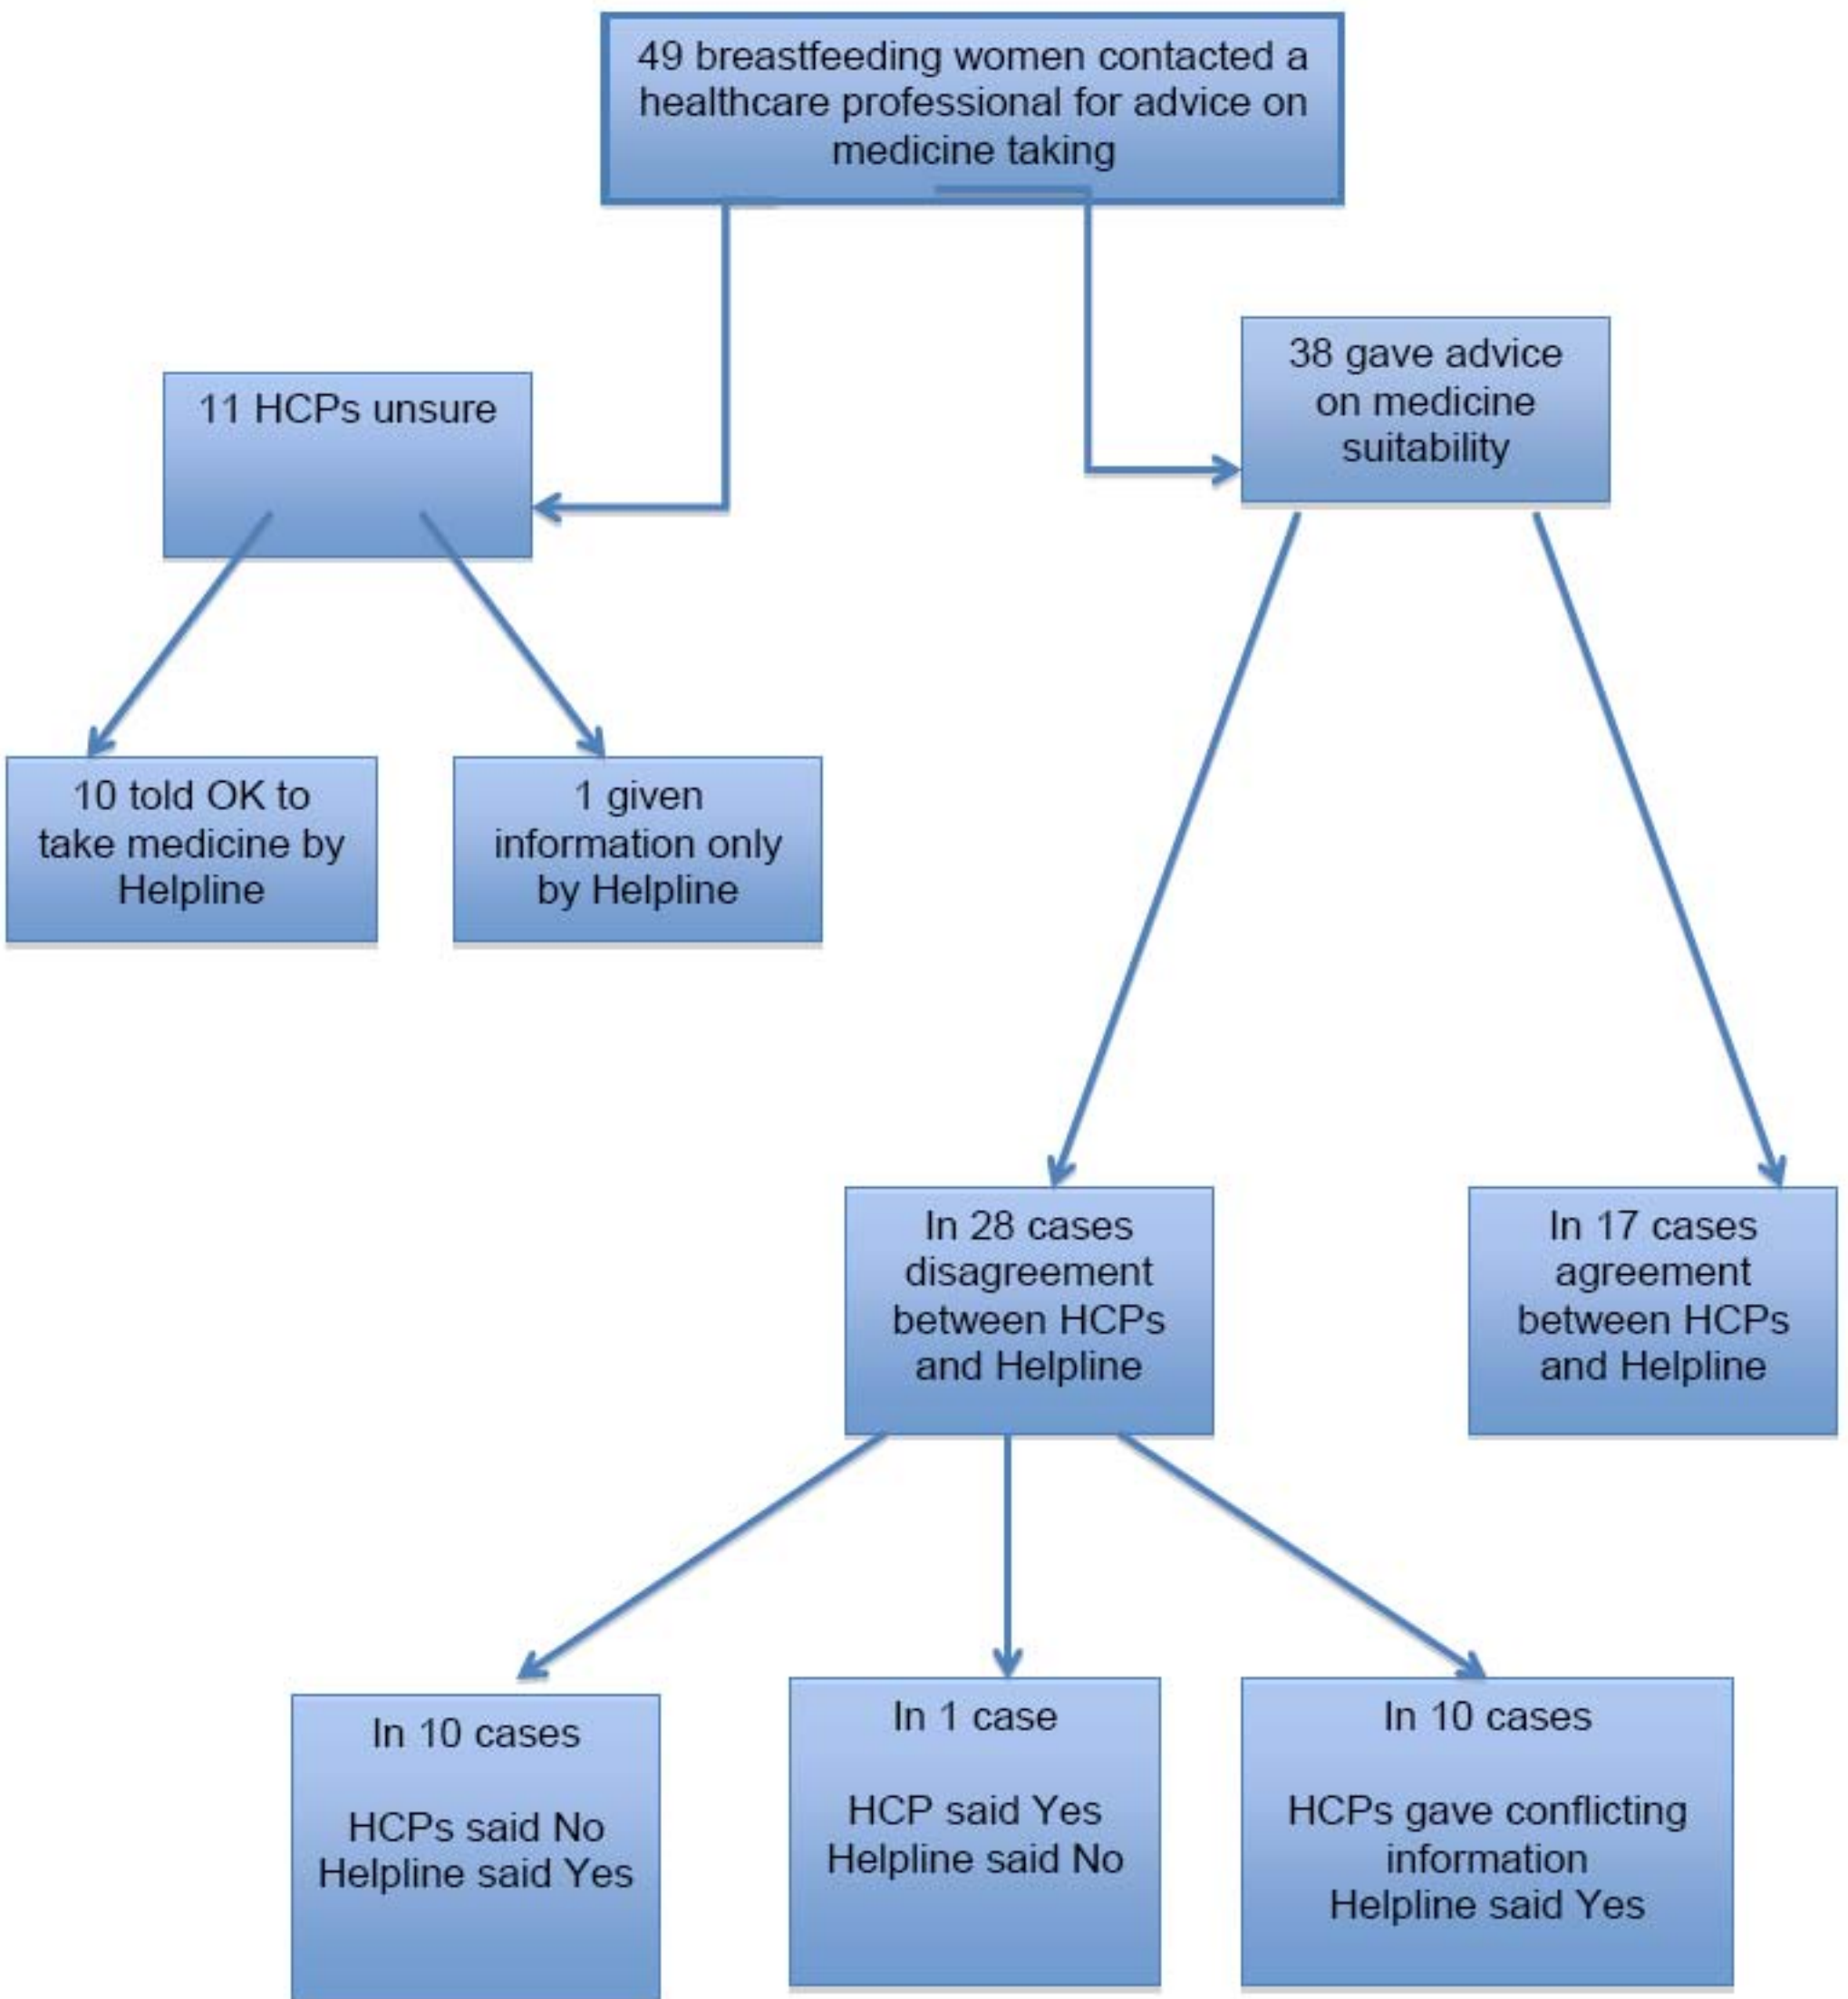

Supplement: MOESM1 [file 9628090]
